# Supplementary material
Source: MDPI journal article supplement (https://www.mdpi.com/2075-163X/11/9/1010)
Supplement: s1 [file s1]

Supplementary TableS1. Zircon U–Pb isotopic data for the Badaguan andesite in the Erguna Block.

| SampleNo. | Isotopic ratios                   |            |                                  |            |                                  |            |                                   |            | Age estimates (Ma)                |            |                                  |            |                                  |            |                                   |            |
|-----------|-----------------------------------|------------|----------------------------------|------------|----------------------------------|------------|-----------------------------------|------------|-----------------------------------|------------|----------------------------------|------------|----------------------------------|------------|-----------------------------------|------------|
|           | $^{207}\text{Pb}/^{206}\text{Pb}$ |            | $^{207}\text{Pb}/^{235}\text{U}$ |            | $^{206}\text{Pb}/^{238}\text{U}$ |            | $^{208}\text{Pb}/^{232}\text{Th}$ |            | $^{207}\text{Pb}/^{206}\text{Pb}$ |            | $^{207}\text{Pb}/^{235}\text{U}$ |            | $^{206}\text{Pb}/^{238}\text{U}$ |            | $^{208}\text{Pb}/^{232}\text{Th}$ |            |
|           | Ratio                             | 1 $\sigma$ | Ratio                            | 1 $\sigma$ | Ratio                            | 1 $\sigma$ | Ratio                             | 1 $\sigma$ | Age                               | 1 $\sigma$ | Age                              | 1 $\sigma$ | Age                              | 1 $\sigma$ | Age                               | 1 $\sigma$ |
| ZRD17-1   | 0.05027                           | 0.00189    | 0.16228                          | 0.00588    | 0.02340                          | 0.00025    | 0.00696                           | 0.00011    | 207                               | 64         | 153                              | 5          | 149                              | 2          | 140                               | 2          |
| ZRD17-2   | 0.05105                           | 0.00234    | 0.16776                          | 0.00744    | 0.02382                          | 0.00030    | 0.00699                           | 0.00013    | 243                               | 79         | 157                              | 6          | 152                              | 2          | 141                               | 3          |
| ZRD17-3   | 0.05647                           | 0.00159    | 0.46892                          | 0.01254    | 0.06019                          | 0.00059    | 0.01855                           | 0.00034    | 471                               | 42         | 390                              | 9          | 377                              | 4          | 372                               | 7          |
| ZRD17-4   | 0.05752                           | 0.00486    | 0.20456                          | 0.0168     | 0.02578                          | 0.00054    | 0.00836                           | 0.00028    | 512                               | 145        | 189                              | 14         | 154                              | 3          | 158                               | 6          |
| ZRD17-5   | 0.05097                           | 0.00214    | 0.17525                          | 0.00708    | 0.02492                          | 0.00029    | 0.00779                           | 0.00013    | 239                               | 72         | 164                              | 6          | 159                              | 2          | 157                               | 3          |
| ZRD17-6   | 0.04863                           | 0.00207    | 0.17354                          | 0.00713    | 0.02587                          | 0.00030    | 0.00728                           | 0.00010    | 130                               | 74         | 162                              | 6          | 155                              | 2          | 147                               | 2          |
| ZRD17-7   | 0.04983                           | 0.00304    | 0.16779                          | 0.00993    | 0.02441                          | 0.00037    | 0.00830                           | 0.00022    | 187                               | 107        | 157                              | 9          | 155                              | 2          | 157                               | 4          |
| ZRD17-8   | 0.05159                           | 0.00208    | 0.24493                          | 0.00952    | 0.03442                          | 0.0004     | 0.00923                           | 0.00020    | 267                               | 68         | 222                              | 8          | 218                              | 2          | 186                               | 4          |
| ZRD17-9   | 0.04798                           | 0.00147    | 0.16517                          | 0.00484    | 0.02496                          | 0.00024    | 0.00764                           | 0.00010    | 98                                | 51         | 155                              | 4          | 159                              | 2          | 154                               | 2          |
| ZRD17-10  | 0.05945                           | 0.00209    | 0.19589                          | 0.00659    | 0.02389                          | 0.00026    | 0.00740                           | 0.00012    | 584                               | 54         | 182                              | 6          | 152                              | 2          | 149                               | 2          |
| ZRD17-11  | 0.07264                           | 0.00159    | 0.56726                          | 0.01149    | 0.05664                          | 0.00052    | 0.01676                           | 0.00026    | 1004                              | 26         | 456                              | 7          | 355                              | 3          | 336                               | 5          |
| ZRD17-12  | 0.05600                           | 0.00166    | 0.45991                          | 0.01302    | 0.05957                          | 0.0006     | 0.01710                           | 0.00029    | 452                               | 45         | 384                              | 9          | 373                              | 4          | 343                               | 6          |
| ZRD17-13  | 0.05434                           | 0.00092    | 0.45484                          | 0.00695    | 0.06071                          | 0.00049    | 0.01829                           | 0.00017    | 385                               | 20         | 381                              | 5          | 380                              | 3          | 366                               | 3          |
| ZRD17-14  | 0.05228                           | 0.00169    | 0.18417                          | 0.00571    | 0.02556                          | 0.00026    | 0.00747                           | 0.00010    | 298                               | 52         | 172                              | 5          | 153                              | 2          | 150                               | 2          |
| ZRD17-15  | 0.06013                           | 0.00165    | 0.48072                          | 0.01253    | 0.05800                          | 0.00057    | 0.02107                           | 0.00043    | 408                               | 78         | 368                              | 10         | 361                              | 3          | 360                               | 3          |
| ZRD17-16  | 0.05025                           | 0.00327    | 0.17783                          | 0.01126    | 0.02568                          | 0.00042    | 0.00772                           | 0.00019    | 207                               | 114        | 166                              | 10         | 153                              | 3          | 155                               | 4          |
| ZRD17-17  | 0.07700                           | 0.00452    | 0.24332                          | 0.01370    | 0.02293                          | 0.00041    | 0.00731                           | 0.00018    | 907                               | 200        | 199                              | 17         | 145                              | 3          | 149                               | 2          |
| ZRD17-18  | 0.05129                           | 0.00107    | 0.24985                          | 0.00793    | 0.03535                          | 0.00037    | 0.01120                           | 0.00019    | 254                               | 54         | 226                              | 6          | 224                              | 2          | 225                               | 4          |
| ZRD17-19  | 0.15855                           | 0.00187    | 0.67892                          | 0.00647    | 0.03108                          | 0.00024    | 0.02897                           | 0.00020    | 786                               | 116        | 223                              | 11         | 154                              | 2          | 160                               | 4          |
| ZRD17-20  | 0.05304                           | 0.00098    | 0.18000                          | 0.00304    | 0.02447                          | 0.00020    | 0.00670                           | 0.00005    | 346                               | 24         | 168                              | 3          | 156                              | 1          | 145                               | 1          |
| Zr15-1    | 0.04946                           | 0.00316    | 0.17018                          | 0.0106     | 0.02495                          | 0.00038    | 0.00825                           | 0.00021    | 170                               | 114        | 160                              | 9          | 159                              | 2          | 156                               | 4          |
| Zr15-2    | 0.04968                           | 0.00265    | 0.17244                          | 0.00892    | 0.02517                          | 0.00034    | 0.00802                           | 0.00017    | 180                               | 94         | 162                              | 8          | 160                              | 2          | 161                               | 3          |
| Zr15-3    | 0.05159                           | 0.00406    | 0.17573                          | 0.01349    | 0.02470                          | 0.00046    | 0.00807                           | 0.00028    | 267                               | 141        | 164                              | 12         | 157                              | 3          | 152                               | 6          |
| Zr15-4    | 0.04940                           | 0.00257    | 0.17029                          | 0.00861    | 0.02500                          | 0.00034    | 0.00777                           | 0.00013    | 167                               | 91         | 160                              | 7          | 159                              | 2          | 156                               | 3          |
| Zr15-5    | 0.04879                           | 0.00303    | 0.17150                          | 0.01037    | 0.02549                          | 0.00038    | 0.00801                           | 0.00019    | 138                               | 108        | 161                              | 9          | 162                              | 2          | 161                               | 4          |
| Zr15-6    | 0.04857                           | 0.00164    | 0.17089                          | 0.00554    | 0.02551                          | 0.00026    | 0.00785                           | 0.00011    | 127                               | 57         | 160                              | 5          | 152                              | 2          | 158                               | 2          |
| Zr15-7    | 0.04952                           | 0.00610    | 0.17693                          | 0.02128    | 0.02591                          | 0.00072    | 0.00818                           | 0.00044    | 173                               | 218        | 165                              | 18         | 161                              | 5          | 155                               | 9          |
| Zr15-8    | 0.04917                           | 0.00397    | 0.17680                          | 0.01393    | 0.02607                          | 0.00050    | 0.00915                           | 0.00029    | 156                               | 141        | 165                              | 12         | 156                              | 3          | 154                               | 6          |
| Zr15-9    | 0.04875                           | 0.00375    | 0.17845                          | 0.01340    | 0.02655                          | 0.00048    | 0.00840                           | 0.00029    | 136                               | 134        | 167                              | 12         | 159                              | 3          | 159                               | 6          |
| Zr15-10   | 0.04911                           | 0.00173    | 0.16995                          | 0.00575    | 0.02509                          | 0.00027    | 0.00762                           | 0.00011    | 153                               | 59         | 159                              | 5          | 160                              | 2          | 153                               | 2          |
| Zr15-11   | 0.04861                           | 0.00431    | 0.18230                          | 0.01577    | 0.02720                          | 0.00055    | 0.01022                           | 0.00039    | 129                               | 155        | 170                              | 14         | 193                              | 3          | 206                               | 8          |
| Zr15-12   | 0.04948                           | 0.00221    | 0.17644                          | 0.00762    | 0.02586                          | 0.00031    | 0.00796                           | 0.00013    | 171                               | 78         | 165                              | 7          | 165                              | 2          | 160                               | 3          |
| Zr15-13   | 0.04990                           | 0.00459    | 0.20039                          | 0.01799    | 0.02912                          | 0.00063    | 0.01016                           | 0.00043    | 190                               | 162        | 185                              | 15         | 190                              | 4          | 204                               | 9          |
| Zr15-14   | 0.05015                           | 0.00179    | 0.20705                          | 0.00712    | 0.02994                          | 0.00032    | 0.00925                           | 0.00015    | 172                               | 60         | 151                              | 6          | 150                              | 2          | 156                               | 3          |
| Zr15-15   | 0.04898                           | 0.00273    | 0.17816                          | 0.00966    | 0.02638                          | 0.00037    | 0.00886                           | 0.00019    | 147                               | 97         | 166                              | 8          | 168                              | 2          | 178                               | 4          |
| Zr15-16   | 0.04958                           | 0.00415    | 0.20531                          | 0.01677    | 0.03003                          | 0.00059    | 0.01067                           | 0.00035    | 175                               | 148        | 190                              | 14         | 191                              | 4          | 215                               | 7          |
| Zr15-17   | 0.05371                           | 0.00225    | 0.21294                          | 0.00863    | 0.02876                          | 0.00035    | 0.00954                           | 0.00015    | 359                               | 69         | 196                              | 7          | 190                              | 2          | 192                               | 3          |
| Zr15-18   | 0.04968                           | 0.00205    | 0.17503                          | 0.00697    | 0.02555                          | 0.00030    | 0.00769                           | 0.00014    | 180                               | 71         | 164                              | 6          | 153                              | 2          | 155                               | 3          |
| Zr15-19   | 0.04883                           | 0.0064     | 0.20483                          | 0.02624    | 0.03043                          | 0.00089    | 0.01008                           | 0.00052    | 140                               | 229        | 189                              | 22         | 205                              | 6          | 203                               | 10         |
| Zr15-20   | 0.04928                           | 0.00359    | 0.18470                          | 0.01314    | 0.02719                          | 0.00047    | 0.00889                           | 0.00028    | 161                               | 128        | 172                              | 11         | 163                              | 3          | 159                               | 6          |

Supplementary Table S2. Major (wt%) and trace element (ppm) data for mafic volcanic rocks in the Erguna Block.

| Lithology                      | mafic volcanic rocks |        |        |       |        |        |        |        |        |
|--------------------------------|----------------------|--------|--------|-------|--------|--------|--------|--------|--------|
| Sample                         | 10506                | 10501  | 13503  | 13505 | 13602  | 13701  | 13710  | ZR15   | RZD17  |
| SiO <sub>2</sub>               | 57.12                | 62.55  | 60.05  | 53.55 | 63.68  | 61.32  | 56.36  | 57.25  | 58.22  |
| TiO <sub>2</sub>               | 1.08                 | 0.80   | 0.89   | 1.45  | 0.91   | 1.07   | 0.90   | 0.95   | 0.97   |
| Al <sub>2</sub> O <sub>3</sub> | 19.86                | 16.75  | 17.70  | 19.14 | 15.49  | 18.63  | 19.30  | 18.70  | 17.23  |
| Fe <sub>2</sub> O <sub>3</sub> | 4.74                 | 3.37   | 5.20   | 7.42  | 4.96   | 6.27   | 5.86   | 4.50   | 5.10   |
| MnO                            | 0.10                 | 0.10   | 0.20   | 0.21  | 0.06   | 0.05   | 0.11   | 0.15   | 0.07   |
| MgO                            | 1.82                 | 2.12   | 1.85   | 2.37  | 1.45   | 0.53   | 2.26   | 1.98   | 1.35   |
| CaO                            | 2.55                 | 2.51   | 4.86   | 4.70  | 2.75   | 1.39   | 4.68   | 2.57   | 2.44   |
| Na <sub>2</sub> O              | 2.76                 | 5.67   | 4.90   | 5.46  | 3.99   | 8.20   | 4.98   | 3.84   | 5.55   |
| K <sub>2</sub> O               | 2.18                 | 2.03   | 1.28   | 1.60  | 4.23   | 0.85   | 1.65   | 1.45   | 1.86   |
| P <sub>2</sub> O <sub>5</sub>  | 0.30                 | 0.20   | 0.25   | 0.33  | 0.33   | 0.24   | 0.27   | 0.25   | 0.30   |
| LOI                            | 3.66                 | 1.88   | 1.79   | 2.26  | 1.16   | 0.87   | 2.20   | 0.24   | 1.15   |
| Total                          | 99.77                | 99.73  | 99.70  | 99.71 | 99.71  | 99.83  | 99.71  | 99.78  | 99.86  |
| A/CNK                          | 1.72                 | 1.04   | 0.97   | 0.99  | 0.96   | 1.10   | 1.04   | 1.49   | 1.10   |
| A/NK                           | 2.88                 | 1.45   | 1.87   | 1.79  | 1.39   | 1.29   | 1.93   | 2.37   | 1.55   |
| Rb                             | 52.09                | 30.71  | 15.91  | 20.64 | 126.96 | 12.73  | 15.2   | 35.23  | 40.23  |
| Ba                             | 626                  | 958    | 745    | 630   | 1023   | 233    | 628    | 678    | 653    |
| Th                             | 5.56                 | 7.88   | 3.84   | 1.95  | 9.69   | 2.19   | 2.29   | 6.02   | 5.23   |
| U                              | 1.08                 | 1.68   | 1.08   | 0.38  | 2.01   | 0.67   | 0.71   | 0.98   | 1.03   |
| Nb                             | 6.26                 | 7.36   | 4.87   | 5.61  | 18.83  | 3.93   | 4.30   | 4.56   | 6.32   |
| Sr                             | 637                  | 808    | 1083   | 897   | 502    | 459    | 857    | 865    | 636    |
| Nd                             | 40.81                | 27.35  | 24.08  | 22.01 | 50.88  | 24.08  | 25.59  | 28.45  | 26.54  |
| Zr                             | 209.5                | 208.6  | 158.8  | 171.4 | 297.7  | 146.6  | 149.4  | 165.2  | 198.2  |
| Hf                             | 4.96                 | 5.67   | 4.5    | 5.61  | 6.87   | 4.52   | 4.47   | 4.96   | 5.23   |
| La                             | 29.94                | 27.74  | 21.29  | 13.78 | 57.79  | 16.85  | 19.18  | 28.88  | 24.56  |
| Ce                             | 56.49                | 55.66  | 43.2   | 32.22 | 113.5  | 37.75  | 38.02  | 54.35  | 47.23  |
| Pr                             | 9.63                 | 7.31   | 6.10   | 5.02  | 14.41  | 5.76   | 6.22   | 7.05   | 6.98   |
| Nd                             | 40.81                | 27.35  | 24.08  | 22.01 | 50.88  | 24.08  | 25.59  | 28.45  | 26.54  |
| Sm                             | 7.72                 | 4.90   | 3.99   | 4.40  | 7.64   | 4.35   | 4.35   | 4.55   | 3.98   |
| Eu                             | 2.02                 | 1.23   | 1.33   | 1.38  | 1.96   | 1.21   | 1.52   | 1.55   | 1.67   |
| Gd                             | 5.72                 | 4.04   | 3.55   | 3.76  | 7.06   | 3.82   | 3.85   | 4.01   | 3.58   |
| Tb                             | 0.90                 | 0.58   | 0.51   | 0.60  | 0.90   | 0.60   | 0.59   | 0.58   | 0.60   |
| Dy                             | 4.25                 | 2.69   | 2.66   | 3.26  | 4.34   | 3.23   | 3.05   | 3.01   | 3.22   |
| Ho                             | 0.71                 | 0.47   | 0.49   | 0.56  | 0.77   | 0.58   | 0.55   | 0.54   | 0.41   |
| Er                             | 1.82                 | 1.25   | 1.26   | 1.38  | 2.16   | 1.47   | 1.44   | 1.45   | 1.33   |
| Tm                             | 0.27                 | 0.19   | 0.2    | 0.2   | 0.35   | 0.23   | 0.25   | 0.24   | 0.30   |
| Yb                             | 1.63                 | 1.12   | 1.32   | 1.34  | 2.33   | 1.41   | 1.44   | 1.35   | 1.20   |
| Lu                             | 0.39                 | 0.33   | 0.31   | 0.27  | 0.64   | 0.29   | 0.3    | 0.31   | 0.28   |
| Y                              | 17.73                | 13.05  | 12.7   | 13.92 | 19.61  | 14.12  | 13.72  | 13.12  | 13.25  |
| ΣREE                           | 162.30               | 134.86 | 110.29 | 90.18 | 264.73 | 101.63 | 106.35 | 136.32 | 121.88 |
| LREE                           | 146.61               | 124.19 | 99.99  | 78.81 | 246.18 | 90.00  | 94.88  | 124.83 | 110.96 |
| HREE                           | 15.69                | 10.67  | 10.30  | 11.37 | 18.55  | 11.63  | 11.47  | 11.49  | 10.92  |
| LREE/HREE                      | 9.34                 | 11.64  | 9.71   | 6.93  | 13.27  | 7.74   | 8.27   | 10.86  | 10.16  |
| LaN/YbN                        | 13.18                | 17.77  | 11.57  | 7.38  | 17.79  | 8.57   | 9.55   | 15.34  | 14.68  |

|                   |       |       |       |       |       |       |       |       |       |
|-------------------|-------|-------|-------|-------|-------|-------|-------|-------|-------|
| $\delta\text{Eu}$ | 0.93  | 0.85  | 1.08  | 1.04  | 0.82  | 0.91  | 1.14  | 1.11  | 1.35  |
| $\delta\text{Ce}$ | 0.82  | 0.96  | 0.93  | 0.95  | 0.96  | 0.94  | 0.85  | 0.93  | 0.88  |
| Ba/La             | 20.93 | 34.54 | 35.00 | 45.73 | 17.71 | 13.87 | 32.76 | 23.49 | 26.60 |
| Th/Yb             | 3.41  | 7.04  | 2.91  | 1.46  | 4.16  | 1.55  | 1.59  | 4.46  | 4.36  |
| Rb/Sr             | 0.08  | 0.04  | 0.01  | 0.02  | 0.25  | 0.03  | 0.02  | 0.04  | 0.06  |
| Lu/Yb             | 0.24  | 0.29  | 0.23  | 0.20  | 0.27  | 0.21  | 0.21  | 0.23  | 0.23  |

Supplementary Table S3. Age and Hf isotopic data of Late Jurassic igneous rocks in the Erguna Massif.

| Sample no. | Lithology               | t (Ma) | $\epsilon_{\text{Hf}}(t)$ | $T_{\text{DM1}}$ | $T_{\text{DM2}}$ | References        |
|------------|-------------------------|--------|---------------------------|------------------|------------------|-------------------|
| M080-1-01  | Trachyandesite          | 156    | 3.7 - 8.7                 | 464-685          | 652-969          | Sun et al., 2013  |
| M036-1-01  | Andesite                | 158    | 3.7 - 6.9                 | 537-664          | 769-971          | Sun et al., 2013  |
| M111-1-01  | Trachyte                | 146    | 6.4 - 8.2                 | 477-549          | 676-790          | Sun et al., 2013  |
| Db-03-5-1  | Granite                 | 153    | 6.4 - 10.7                | 387-565          | 522-794          | Sun et al., 2017  |
| M009-1-01  | Syenogranite            | 149    | 0.7 - 6.2                 | 552-776          | 801-1155         | Wang et al., 2014 |
| M026-1-01  | Quartz orthophyre       | 149    | 1.6 - 6.1                 | 557-734          | 809-1094         | Wang et al., 2014 |
| M099-1-1   | Alkali feldspar granite | 151    | 5.5 - 9.7                 | 418-562          | 580-847          | Wang et al., 2014 |
| 11ER22-4   | Monzonite               | 155    | 0.9 - 3.2                 | 687-768          | 999-1147         | Tang et al., 2015 |
| 11ER21-1   | Monzonite               | 155    | 0.4 - 2.1                 | 738-789          | 1071-1181        | Tang et al., 2015 |
| 13ER16-1   | Quartz monzonite        | 155    | 2.4 - 3.9                 | 748-703          | 956-1051         | Tang et al., 2015 |
| 12ER35-1   | Quartz monzonite        | 156    | 1.0 - 4.7                 | 619-769          | 906-1142         | Tang et al., 2015 |
| 13ER48-1   | Syenogranite            | 150    | 0.7 - 3.5                 | 671-778          | 970-1156         | Tang et al., 2015 |
| 12ER2-1    | Syenogranite            | 152    | 3.8 - 6.9                 | 533-652          | 759-958          | Tang et al., 2015 |
| Z10-27     | Granodiorite            | 149    | 6.0 - 11.0                | 363-569          | 452~735Ma        | Shi, 2015         |
| Z11-64     | Monzogranite            | 150    | 4.4 - 11.0                | 370-633          | 455~818Ma        | Shi, 2015         |
| Z10-28     | Andesite                | 151    | 4.7 - 11.3                | 363-633          | 441~810          | Shi, 2015         |
| Z10-18     | Monzogranite            | 152    | 4.4 - 9.4                 | 442-638          | 545~823Ma        | Shi, 2015         |
| M007-1-01  | Rhyolite                | 162    | 4.4 - 6.7                 | 545-658          | 773-959          | Gou et al., 2013  |
| M133-1     | Trachyandesite          | 164    | 0.7 - 2.3                 | 725-788          | 1063-1168        | Zhao et al., 2013 |
